# Supplementary material
Source: PubMed Central journal article supplement (PMC3978393)
Supplement: neo1602_0129SD1.pdf [file neo1602_0129SD1.pdf]

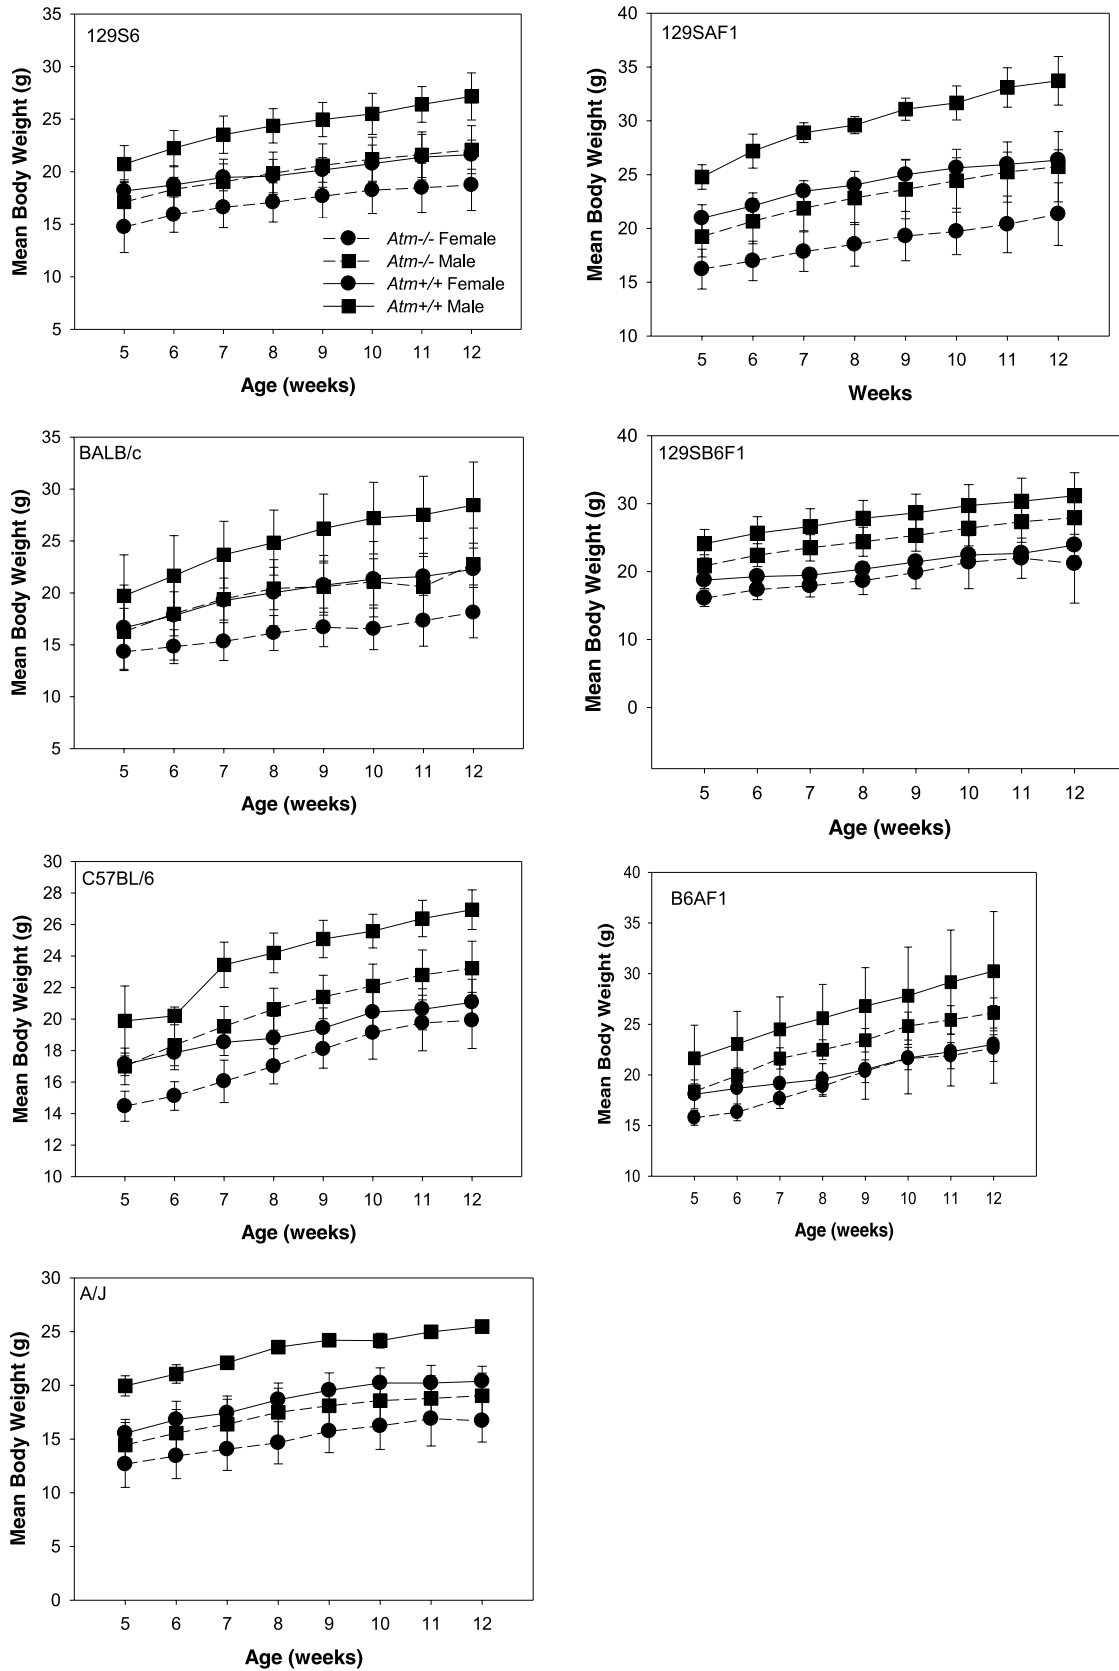

**Figure W1.** Growth retardation in male (■) and female (●)  $Atm^{-/-}$  mice (dashed lines) compared with  $Atm^{+/+}$  littermates (solid lines). Error bars indicate  $\pm$ SD.

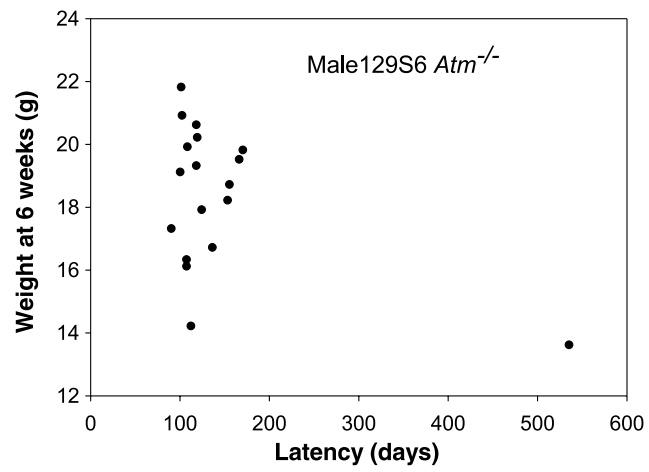

**Figure W2.** Scatterplot of lymphoma latency and weight at 6 weeks of age for male 129S6 *Atm*<sup>-/-</sup> mice.
