# Supplementary material
Source: PubMed Central journal article supplement (PMC3978393)
Supplement: neo1602_0129SD2.pdf [file neo1602_0129SD2.pdf]

## Supplementary Materials Table W1

*GzmB-GzmC* fusion gene primers

|         |                        |
|---------|------------------------|
| GzmB-F1 | TGCCTTCTTCCTCTCCTAGA   |
| GzmB-F2 | ACTCTTGACGCTGGGACCTA   |
| GzmB-F3 | GAAGATGAAGATCCTCCTGCT  |
| GzmB-F4 | ACCTTGTCTCTGGCCTCCA    |
| GzmB-F5 | GGCGCAATGTCAATGTGAAG   |
| GzmB-F6 | TGCATTCCCCACCCAGACTA   |
| GzmB-F7 | TATAATCCTAAGACATTC     |
| GzmB-R1 | ATTGGCCTGCCAAGGACAGA   |
| GzmC-F1 | CTTCCAGGGCTTTGTCTAC    |
| GzmC-R1 | TCAGTTGCTGCCAGCTGTCC   |
| GzmC-R2 | GATGGCTGGTCAGATCAGGA   |
| GzmC-R3 | TCATCGTTTTCTTTATCCACGA |
| GzmC-R4 | ATCCATCAGTTTGCCCGTAG   |
| GzmC-R5 | GGAACTGGGACTCACACACC   |
| GzmC-R6 | TGGGACTCACACACCTGATCC  |
| GzmC-R7 | GTAAGAACTTTGGAACTG     |
