# Supplementary material
Source: PubMed Central journal article supplement (PMC3978393)
Supplement: neo1602_0129SD3.pdf [file neo1602_0129SD3.pdf]

**Supplementary Table W2****Significant regions of gain and loss (p≤0.05, aggregate >22 % across the genome)**

| Region                        | Region Length | Event   | Genes | miRNAs | Frequency % | P-Value |
|-------------------------------|---------------|---------|-------|--------|-------------|---------|
| chr1:87,559,041-87,628,161    | 69120         | CN Gain | 2     | 0      | 45.45454545 | 0.004   |
| chr1:91,567,826-91,894,821    | 326995        | CN Loss | 4     | 0      | 27.27272727 | 0.002   |
| chr1:120,746,294-120,820,070  | 73776         | CN Loss | 1     | 0      | 27.27272727 | 0.002   |
| chr1:139,661,239-139,895,884  | 234645        | CN Gain | 2     | 2      | 45.45454545 | 0.004   |
| chr1:139,960,882-140,273,506  | 312624        | CN Gain | 2     | 0      | 54.54545455 | 0       |
| chr1:158,205,737-158,464,039  | 258302        | CN Gain | 3     | 0      | 45.45454545 | 0.004   |
| chr1:184,810,289-185,829,620  | 1019331       | CN Gain | 2     | 0      | 45.45454545 | 0.004   |
| chr2:62,190,809-62,245,970    | 55161         | CN Gain | 1     | 0      | 36.36363636 | 0       |
| chr2:179,012,936-179,228,562  | 215626        | CN Loss | 2     | 0      | 27.27272727 | 0.002   |
| chr2:179,911,749-179,965,309  | 53560         | CN Loss | 1     | 0      | 27.27272727 | 0.002   |
| chr3:25,417,412-25,454,604    | 37192         | CN Loss | 1     | 0      | 27.27272727 | 0.016   |
| chr3:92,015,085-92,076,824    | 61739         | CN Loss | 4     | 0      | 27.27272727 | 0.016   |
| chr3:130,644,634-130,711,922  | 67288         | CN Gain | 0     | 0      | 36.36363636 | 0.001   |
| chr4:152,483,952-152,911,565  | 427613        | CN Loss | 1     | 0      | 45.45454545 | 0.001   |
| chr4:153,009,114-153,026,250  | 17136         | CN Loss | 0     | 0      | 45.45454545 | 0.001   |
| chr4:153,047,559-153,371,758  | 324199        | CN Loss | 4     | 0      | 45.45454545 | 0.001   |
| chr4:153,427,806-153,488,755  | 60949         | CN Loss | 1     | 0      | 45.45454545 | 0.001   |
| chr4:153,593,011-154,031,499  | 438488        | CN Loss | 4     | 0      | 45.45454545 | 0.001   |
| chr5:11,088,920-11,178,715    | 89795         | CN Loss | 0     | 0      | 27.27272727 | 0.018   |
| chr5:11,617,017-11,693,443    | 76426         | CN Loss | 0     | 0      | 27.27272727 | 0.018   |
| chr5:38,203,898-38,234,459    | 30561         | CN Loss | 2     | 0      | 27.27272727 | 0.018   |
| chr5:113,154,092-113,385,102  | 231010        | CN Loss | 3     | 0      | 27.27272727 | 0.018   |
| chr5:141,700,945-142,019,051  | 318106        | CN Gain | 1     | 0      | 45.45454545 | 0.011   |
| chr5:143,768,946-143,860,150  | 91204         | CN Gain | 1     | 0      | 45.45454545 | 0.011   |
| chr5:144,205,710-144,312,710  | 107000        | CN Gain | 3     | 0      | 45.45454545 | 0.011   |
| chr5:150,399,825-152,537,259  | 2137434       | CN Gain | 17    | 0      | 36.36363636 | 0       |
| chr6:8,202,358-8,482,707      | 280349        | CN Gain | 4     | 0      | 27.27272727 | 0.038   |
| chr6:33,373,028-33,585,221    | 212193        | CN Gain | 1     | 0      | 27.27272727 | 0.038   |
| chr6:41,068,432-41,493,819    | 425387        | CN Loss | 9     | 0      | 36.36363636 | 0.021   |
| chr6:41,493,819-41,518,495    | 24676         | CN Gain | 0     | 0      | 27.27272727 | 0.038   |
| chr6:114,457,435-114,552,563  | 95128         | CN Loss | 0     | 0      | 36.36363636 | 0.021   |
| chr6:146,501,252-146,539,461  | 38209         | CN Gain | 2     | 0      | 27.27272727 | 0.038   |
| chr7:7,349,848-7,455,890      | 106042        | CN Loss | 2     | 0      | 27.27272727 | 0.047   |
| chr8:3,104,105-3,146,144      | 42039         | CN Gain | 0     | 0      | 36.36363636 | 0       |
| chr8:12,791,414-12,932,959    | 141545        | CN Loss | 3     | 0      | 27.27272727 | 0.006   |
| chr8:72,041,446-72,104,323    | 62877         | CN Loss | 0     | 0      | 27.27272727 | 0.006   |
| chr9:32,248,443-33,074,645    | 826202        | CN Gain | 2     | 0      | 36.36363636 | 0.036   |
| chr9:71,857,534-71,977,167    | 119633        | CN Gain | 1     | 0      | 36.36363636 | 0.036   |
| chr9:123,512,450-123,531,010  | 18560         | CN Gain | 1     | 0      | 36.36363636 | 0.036   |
| chr9:123,585,258-123,863,577  | 278319        | CN Gain | 7     | 0      | 36.36363636 | 0.036   |
| chr10:28,212,711-28,386,023   | 173312        | CN Gain | 1     | 0      | 45.45454545 | 0.017   |
| chr10:79,608,935-79,632,277   | 23342         | CN Loss | 2     | 0      | 27.27272727 | 0.002   |
| chr10:122,015,080-122,201,128 | 186048        | CN Gain | 1     | 0      | 45.45454545 | 0.017   |
| chr10:129,960,467-129,993,255 | 32788         | CN Gain | 0     | 0      | 27.27272727 | 0       |

|                               |          |         |     |    |             |       |
|-------------------------------|----------|---------|-----|----|-------------|-------|
| chr11:3,101,853-3,186,441     | 84588    | CN Gain | 2   | 0  | 36.36363636 | 0.005 |
| chr12:42,273,661-42,795,332   | 521671   | CN Gain | 1   | 0  | 45.45454545 | 0.003 |
| chr12:106,963,312-107,007,867 | 44555    | CN Loss | 1   | 0  | 72.72727273 | 0.008 |
| chr12:107,813,507-115,976,910 | 8163403  | CN Loss | 161 | 66 | 72.72727273 | 0.008 |
| chr12:116,038,652-116,265,245 | 226593   | CN Loss | 0   | 0  | 72.72727273 | 0.008 |
| chr12:116,354,959-116,508,543 | 153584   | CN Loss | 0   | 0  | 81.81818182 | 0     |
| chr12:116,591,586-121,257,530 | 4665944  | CN Loss | 20  | 1  | 72.72727273 | 0     |
| chr13:19,278,732-19,433,150   | 154418   | CN Loss | 0   | 0  | 36.36363636 | 0.011 |
| chr13:91,932,088-92,920,690   | 988602   | CN Gain | 3   | 0  | 27.27272727 | 0.011 |
| chr14:42,014,772-54,387,529   | 12372757 | CN Gain | 152 | 2  | 81.81818182 | 0.018 |
| chr14:54,734,544-54,781,298   | 46754    | CN Loss | 0   | 0  | 63.63636364 | 0.039 |
| chr14:125,095,243-125,194,864 | 99621    | CN Loss | 0   | 0  | 45.45454545 | 0     |
| chr15:97,968,256-103,494,974  | 5526718  | CN Gain | 192 | 5  | 63.63636364 | 0     |
| chr16:75,865,104-75,946,932   | 81828    | CN Gain | 1   | 0  | 63.63636364 | 0.002 |
| chr16:76,255,226-76,668,348   | 413122   | CN Gain | 1   | 0  | 63.63636364 | 0.002 |
| chr16:93,166,884-93,279,721   | 112837   | CN Gain | 0   | 0  | 63.63636364 | 0.002 |
| chr16:94,085,728-94,468,222   | 382494   | CN Gain | 2   | 0  | 63.63636364 | 0.002 |
| chr16:94,555,459-94,750,680   | 195221   | CN Gain | 4   | 0  | 63.63636364 | 0.002 |
| chr16:98,301,065-98,319,150   | 18085    | CN Gain | 1   | 0  | 27.27272727 | 0     |
| chr17:18,726,037-18,768,559   | 42522    | CN Gain | 1   | 0  | 36.36363636 | 0.009 |
| chr17:19,319,652-19,375,459   | 55807    | CN Gain | 0   | 0  | 36.36363636 | 0.009 |
| chr17:51,883,614-51,955,147   | 71533    | CN Gain | 1   | 0  | 36.36363636 | 0.009 |
| chr17:51,968,786-51,987,544   | 18758    | CN Gain | 1   | 0  | 36.36363636 | 0.009 |
| chr17:52,201,778-52,662,021   | 460243   | CN Gain | 0   | 0  | 36.36363636 | 0.009 |
| chr17:85,837,860-85,941,287   | 103427   | CN Loss | 1   | 0  | 36.36363636 | 0.029 |
| chr17:86,061,480-86,096,454   | 34974    | CN Loss | 1   | 0  | 36.36363636 | 0.029 |
| chr18:39,593,879-40,104,086   | 510207   | CN Gain | 2   | 0  | 27.27272727 | 0.018 |
| chr18:49,924,379-50,089,175   | 164796   | CN Gain | 2   | 0  | 27.27272727 | 0.018 |
| chr19:32,840,236-32,927,510   | 87274    | CN Loss | 1   | 0  | 45.45454545 | 0.005 |
| chrX:29,237,353-29,451,167    | 213814   | CN Loss | 0   | 0  | 36.36363636 | 0     |
| chrX:39,730,053-39,891,969    | 161916   | CN Gain | 2   | 0  | 63.63636364 | 0.006 |
| chrX:155,692,013-155,730,466  | 38453    | CN Gain | 1   | 0  | 63.63636364 | 0.006 |
| chrX:155,773,267-156,255,467  | 482200   | CN Gain | 5   | 0  | 63.63636364 | 0.006 |
| chrX:163,378,778-163,398,157  | 19379    | CN Gain | 0   | 0  | 63.63636364 | 0.006 |
| chrX:163,481,737-163,624,240  | 142503   | CN Gain | 1   | 0  | 63.63636364 | 0.006 |
| chrX:166,112,208-166,164,300  | 52092    | CN Gain | 1   | 0  | 63.63636364 | 0.006 |
| chrX:166,337,097-166,380,477  | 43380    | CN Gain | 1   | 0  | 63.63636364 | 0.006 |
| chrX:166,400,168-166,408,764  | 8596     | CN Gain | 1   | 0  | 63.63636364 | 0.006 |
| chrX:166,408,764-166,650,296  | 241532   | CN Loss | 2   | 0  | 36.36363636 | 0     |
| chrY:815,501-951,143          | 135642   | CN Loss | 0   | 0  | 36.36363636 | 0.005 |
| chrY:2,026,264-2,179,177      | 152913   | CN Loss | 8   | 0  | 36.36363636 | 0.005 |
| chrY:2,522,163-2,601,483      | 79320    | CN Gain | 0   | 0  | 27.27272727 | 0     |
