# Supplementary material
Source: PubMed Central journal article supplement (PMC3978393)
Supplement: neo1602_0129SD4.pdf [file neo1602_0129SD4.pdf]

Supplementary **Table W3**. Significant regions of gain and loss identified by GISTIC analysis (q-bound 0.05, G-score  $\geq 1.0$ )

**#chr14:46,085,585-46,368,138 (282,553)**

| Gene Symbol   | Chromosome | Start    | End      | Length |
|---------------|------------|----------|----------|--------|
| Fermt2        | chr14      | 46078466 | 46149740 | 71275  |
| 4930527F14Rik | chr14      | 46163384 | 46182551 | 19168  |
| Ddhd1         | chr14      | 46212848 | 46277818 | 64971  |
| Mir5131       | chr14      | 46277635 | 46277728 | 94     |

**#chrX:156,058,508-156,075,502 (16,994)**

| Gene Symbol | Chromosome | Start     | End       | Length |
|-------------|------------|-----------|-----------|--------|
| Sh3kbp1     | chrX       | 156065339 | 156413849 | 348511 |

**#chr3:25,417,412-25,454,604 (37,192)**

| Gene Symbol | Chromosome | Start    | End      | Length |
|-------------|------------|----------|----------|--------|
| Nlgn1       | chr3       | 25330762 | 26230831 | 900070 |

**#chr12:117,264,279-121,257,530 (3,993,251)**

| Gene Symbol   | Chromosome | Start     | End       | Length |
|---------------|------------|-----------|-----------|--------|
| Zfp386        | chr12      | 117285934 | 117299062 | 13129  |
| Vipr2         | chr12      | 117316195 | 117384734 | 68540  |
| Wdr60         | chr12      | 117445522 | 117501498 | 55977  |
| Esyt2         | chr12      | 117519694 | 117611571 | 91878  |
| D430020J02Rik | chr12      | 117640419 | 117643634 | 3216   |
| Ncapg2        | chr12      | 117643874 | 117702004 | 58131  |
| Ptprn2        | chr12      | 117724192 | 118516640 | 792449 |
| Gm10421       | chr12      | 118382995 | 118389742 | 6748   |
| Mir153        | chr12      | 118489289 | 118489358 | 70     |
| Gm5441        | chr12      | 118472993 | 118575485 | 102493 |
| Rapgef5       | chr12      | 118754951 | 118995451 | 240501 |
| Cdca7l        | chr12      | 119082333 | 119117179 | 34847  |
| Dnahc11       | chr12      | 119116454 | 119437516 | 321063 |
| Sp4           | chr12      | 119473405 | 119539913 | 66509  |
| D230030E09Rik | chr12      | 119756769 | 119768666 | 11898  |
| Sp8           | chr12      | 120084801 | 120091051 | 6251   |
| Abcb5         | chr12      | 120106296 | 120204894 | 98599  |
| Itgb8         | chr12      | 120401275 | 120476749 | 75475  |
| Macc1         | chr12      | 120681882 | 120705405 | 23524  |
| Tmem196       | chr12      | 121184434 | 121257179 | 72746  |

**#chr12:108,949,967-109,027,710 (77,743)**

| Gene Symbol   | Chromosome | Start     | End       | Length |
|---------------|------------|-----------|-----------|--------|
| 4930465M20Rik | chr12      | 108961952 | 108973698 | 11747  |

**#chr19:32,840,236-32,927,510 (87,274)**

| Gene Symbol | Chromosome | Start    | End      | Length |
|-------------|------------|----------|----------|--------|
| Pten        | chr19      | 32832066 | 32900650 | 68585  |

**#chrX:166,408,764-166,428,414 (19,650)**

| <b>Gene Symbol</b> | <b>Chromosome</b> | <b>Start</b> | <b>End</b> | <b>Length</b> |
|--------------------|-------------------|--------------|------------|---------------|
| Mid1               | chrX              | 166123178    | 166428729  | 305552        |
| G530011O06Rik      | chrX              | 166412974    | 166416849  | 3876          |
